# Supplementary material for: Skillful seasonal predictions of continental East-Asian summer rainfall by integrating its spatio-temporal evolution
Source: PubMed Central journal article supplement — Nat Commun. 2025 Jan 3;16:273. doi: 10.1038/s41467-024-55271-1 (PMC11699286; doi:10.1038/s41467-024-55271-1), 2025-01-03
Supplement: 41467_2024_55271_MOESM1_ESM.pdf [file 41467_2024_55271_MOESM1_ESM.pdf]

1 **Supplementary Information**

2 **Skillful Seasonal Predictions of Continental East-Asian Summer Rainfall**  
3 **by Integrating its Spatio-Temporal Evolution**

4  
5 Jieru Ma<sup>1</sup>, Hong-Li Ren<sup>1,\*</sup>, Ming Cai<sup>2</sup>, Yi Deng<sup>3</sup>, Chenguang Zhou<sup>1</sup>,

6 Jian Li<sup>1</sup>, Huizheng Che<sup>4</sup>, Lin Wang<sup>5</sup>

7 <sup>1</sup> State Key Laboratory of Severe Weather and Institute of Tibetan Plateau Meteorology, Chinese  
8 Academy of Meteorological Sciences, Beijing, China

9 <sup>2</sup> Department of Earth, Ocean, and Atmospheric Science, Florida State University, Tallahassee, FL,  
10 USA

11 <sup>3</sup> School of Earth and Atmospheric Sciences, Georgia Institute of Technology, Atlanta, GA, USA

12 <sup>4</sup> Key Laboratory of Atmospheric Chemistry of China Meteorological Administration, Chinese  
13 Academy of Meteorological Sciences, Beijing, China

14 <sup>5</sup> Institute of Artificial Intelligence for Meteorology, Chinese Academy of Meteorological Sciences,  
15 Beijing, China

16  
17 Correspondence to: H.-L. Ren  
18 renhl@cma.gov.cn

19  
20 **Contents of this file**

21 Supplementary Table 1.

22 Supplementary Table 2.

23 Supplementary Table 3.

|    |                          |
|----|--------------------------|
| 24 | Supplementary Table 4.   |
| 25 | Supplementary Fig. 1.    |
| 26 | Supplementary Fig. 2.    |
| 27 | Supplementary Fig. 3.    |
| 28 | Supplementary Fig. 4.    |
| 29 | Supplementary Fig. 5.    |
| 30 | Supplementary Fig. 6.    |
| 31 | Supplementary Fig. 7.    |
| 32 | Supplementary Fig. 8.    |
| 33 | Supplementary Fig. 9.    |
| 34 | Supplementary Fig. 10.   |
| 35 | Supplementary Fig. 11.   |
| 36 | Supplementary Fig. 12.   |
| 37 | Supplementary Fig. 13.   |
| 38 | Supplementary Fig. 14.   |
| 39 | Supplementary References |
| 40 |                          |

41 **Supplementary Table 1.** Details of the nine dynamical models in the period of 1993–2016 used  
 42 in this study. These nine dynamical models are provided by the China Meteorological  
 43 Administration (CMA) and the Copernicus Climate Change Service (C3S).

| Number | Full name of the model and reference                                                                                    | Abbreviation | Atmospheric horizontal resolution | Hindcast ensemble size |
|--------|-------------------------------------------------------------------------------------------------------------------------|--------------|-----------------------------------|------------------------|
| 1      | BCC-CSM1.1m from the China Meteorological Administration <sup>1</sup>                                                   | CMA          | T106                              | 24                     |
| 2      | SPS3.5 of Euro-Mediterranean Center on Climate Change (Centro Euro-Mediterraneo sui Cambiamenti Climatici) <sup>2</sup> | CMCC         | 0.5°×0.5°                         | 40                     |
| 3      | Deutscher Wetterdienst GCFS2.0 <sup>3</sup>                                                                             | DWD          | T127                              | 30                     |
| 4      | GEM5-NEMO of Environment and Climate Change Canada <sup>4</sup>                                                         | ECCC         | 1°×1°                             | 10                     |
| 5      | European Centre for Medium-Range Weather Forecasts SEAS5 <sup>5</sup>                                                   | ECMWF        | T <sub>co</sub> 319               | 25                     |
| 6      | Japan Meteorological Agency Coupled Prediction System version 3 <sup>6</sup>                                            | JMA          | TL319                             | 10                     |
| 7      | Météo-France System 8 <sup>7</sup>                                                                                      | MF           | TL359                             | 25                     |
| 8      | CFSv2 of National Centers for Environmental Prediction <sup>8</sup>                                                     | NCEP         | T126                              | 24                     |
| 9      | The United Kingdom Met Office GloSea6 <sup>9</sup>                                                                      | UKMO         | N216                              | 28                     |

44

45 **Supplementary Table 2.** The information of six climate indices and corresponding correlations  
 46 with six precursors. Column 1 lists the six climate indices denoting climate variability modes  
 47 influencing East Asia rainfall variability, and columns 3–8 represent the correlation coefficients  
 48 between climate indices and precursors in this study. Endings with two (one) asterisks indicate the  
 49 values exceeding the 99% (90%) confidence level.

| Definition and Reference                                                                                                                      | Data Source | Abbreviation | Autumn  | Spring | Winter  | Autumn  | Winter | Spring |
|-----------------------------------------------------------------------------------------------------------------------------------------------|-------------|--------------|---------|--------|---------|---------|--------|--------|
|                                                                                                                                               |             |              | IAP     | EIP    | EWP     | ET      | ESAP   | EPT    |
| Spatial mean of near-surface air temperature (SAT) over north Pacific Ocean (30° to 50° N, 140° E to 140°W) <sup>10</sup>                     | 1           | NPSST        | -0.45** |        |         |         |        |        |
| Snow depth anomalies in Tibetan Plateau (26° to 40°N, 73° to 105°E) <sup>11</sup>                                                             | 2           | TPSD         | 0.44**  |        |         |         |        | 0.48** |
| Spatial mean sea level pressure over Mascarene (25° to 35°S, 40° to 90°E) <sup>10</sup>                                                       | 3           | MSLP         | -0.35*  |        |         |         |        |        |
| Meridional land-ocean SAT contrast between East Asia (20-60N, 60-120E) and south Indian Ocean (0° to 40°S, 50° to 110°E) <sup>10</sup>        | 1           | MLOC         |         | 0.52** | -0.54** | -0.51** | 0.57** |        |
| Western Pacific subtropical high defined as $U_{850}$ (25° to 35°N, 120° to 150°E) minus $U_{850}$ (10° to 20°N, 130° to 150°E) <sup>12</sup> | 4           | WPSH         |         |        |         | 0.39**  |        |        |
| Sea surface temperature anomalies over eastern tropical Pacific ocean (5°S to 5°N, 150° to 90°W) <sup>13</sup>                                | 5           | Niño 3       |         |        |         |         |        | 0.96** |

50

51 **Supplementary Table 3.** Details of three satellite-gauge-based precipitation datasets for the  
 52 period of 1980–2022.

| Number | Full name of the dataset and references                                     | Abbreviation | Provider                                | Resolution  | Uniform Resource Locator                                                                                        |
|--------|-----------------------------------------------------------------------------|--------------|-----------------------------------------|-------------|-----------------------------------------------------------------------------------------------------------------|
| 1      | Global Precipitation Climatology Project analysis product <sup>14</sup>     | GPCP         | NOAA Physical Sciences Laboratory (PSL) | 2.5° × 2.5° | <a href="https://psl.noaa.gov/data/gridded/data.gpcp.html">https://psl.noaa.gov/data/gridded/data.gpcp.html</a> |
| 2      | Climate Prediction Center merged analysis of precipitation <sup>15</sup>    | CMAP         | NOAA PSL                                | 2.5° × 2.5° | <a href="https://psl.noaa.gov/data/gridded/data.cmap.html">https://psl.noaa.gov/data/gridded/data.cmap.html</a> |
| 3      | Global Precipitation Climatology Centre precipitation dataset <sup>16</sup> | GPCC         | NOAA PSL                                | 0.5° × 0.5° | <a href="https://psl.noaa.gov/data/gridded/data.gpcc.html">https://psl.noaa.gov/data/gridded/data.gpcc.html</a> |

53

54

55 **Supplementary Table 4.** A list of data sources for the climate indices listed in Supplementary

56 Table 2. The information includes the dataset name and the Uniform Resource Locator.

| Number | Dataset name             | Uniform Resource Locator                                                                                                                                                      |
|--------|--------------------------|-------------------------------------------------------------------------------------------------------------------------------------------------------------------------------|
| 1      | HadCRUT ensemble mean    | <a href="https://www.metoffice.gov.uk/hadobs/hadcrut5/data/HadCRUT.5.0.2.0/download.html">https://www.metoffice.gov.uk/hadobs/hadcrut5/data/HadCRUT.5.0.2.0/download.html</a> |
| 2      | Daily snow depth dataset | <a href="https://data.tpdc.ac.cn/en/data/df40346a-0202-4ed2-bb07-b65dfcda9368/">https://data.tpdc.ac.cn/en/data/df40346a-0202-4ed2-bb07-b65dfcda9368/</a>                     |
| 3      | NCEP/NCAR reanalysis 2   | <a href="https://downloads.psl.noaa.gov/Datasets/ncep.reanalysis2/Monthlies/surface/">https://downloads.psl.noaa.gov/Datasets/ncep.reanalysis2/Monthlies/surface/</a>         |
| 4      | NCEP/NCAR reanalysis 2   | <a href="https://downloads.psl.noaa.gov/Datasets/ncep.reanalysis2/pressure/">https://downloads.psl.noaa.gov/Datasets/ncep.reanalysis2/pressure/</a>                           |
| 5      | Niño 3                   | <a href="https://psl.noaa.gov/data/correlation/nina3.anom.data">https://psl.noaa.gov/data/correlation/nina3.anom.data</a>                                                     |

57

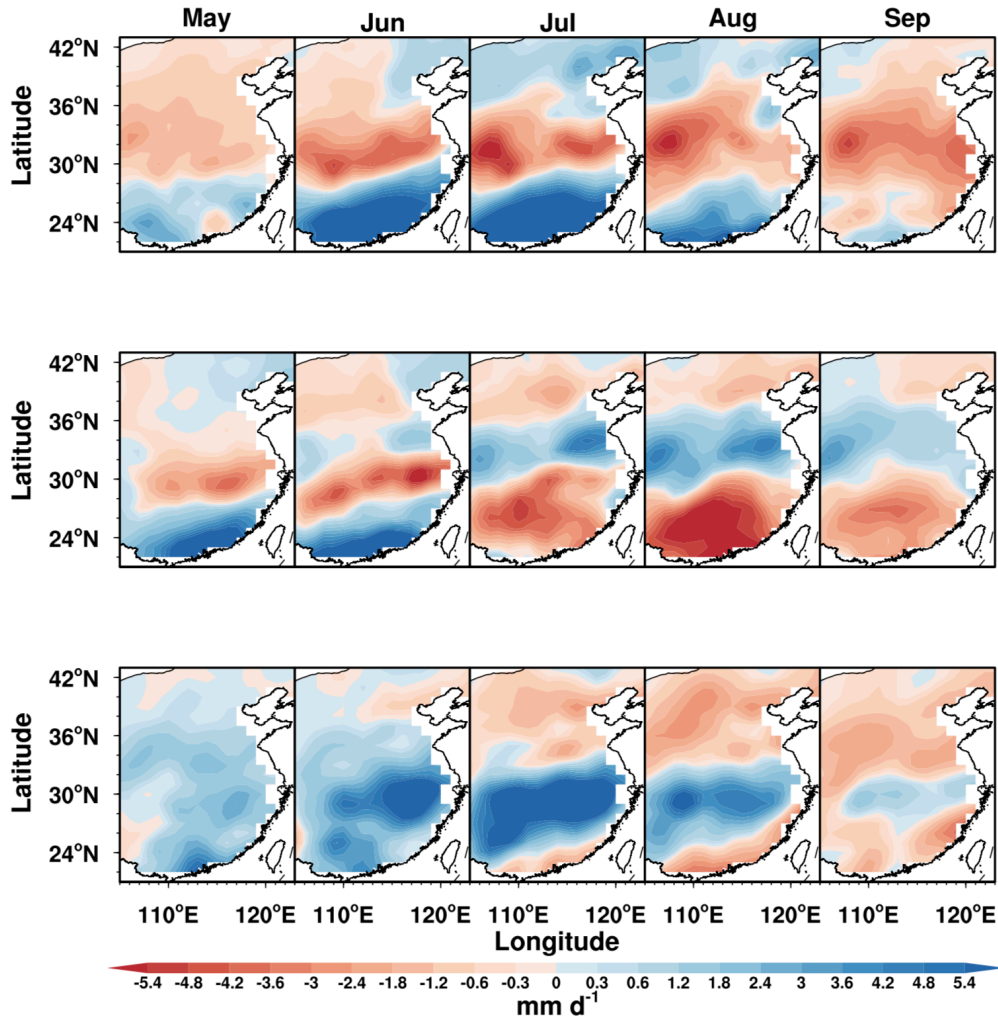

58  
 59 **Supplementary Figure 1. The monthly rainfall patterns of the three spatiotemporal patterns**  
 60 **of East-Asian rainfall anomalies in boreal summer.** The three rows from top to bottom represent  
 61 the monthly spatial patterns of the three distinct spatiotemporal patterns identified in the training  
 62 period of 1980–2009. Unit of the color bar is  $\text{mm d}^{-1}$ . The five columns from left to right are spatial  
 63 rainfall patterns for May, June, July, August, and September, respectively.

64

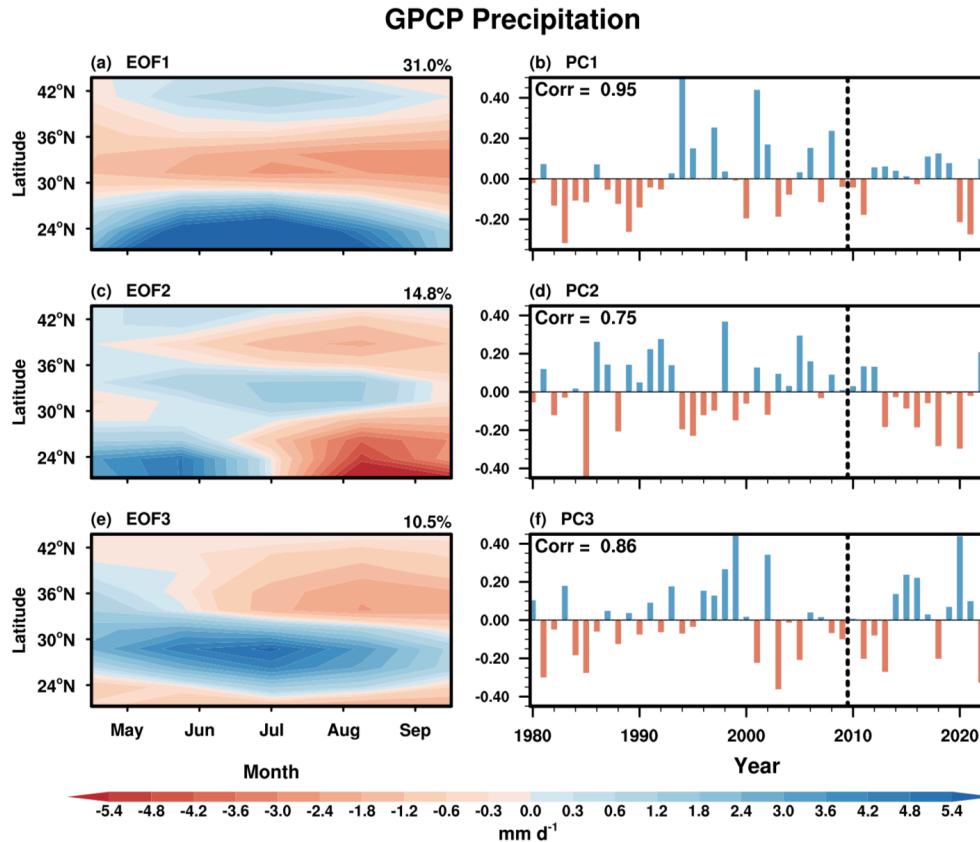

66

67 **Supplementary Figure 2. Spatiotemporal patterns of continental East-Asian summer rainfall**68 **anomalies derived from GPCP observation.** The left panels (a, c, e) display the spatiotemporal

69 evolution patterns corresponding to the leading three modes of empirical orthogonal functions

70 (EOFs) derived from monthly precipitation anomalies zonally averaged over East Asia during

71 training period of boreal 1980–2009 summers. The unit of the color bar for the spatiotemporal

72 patterns is mm d<sup>-1</sup>. The bars in the right panels (b, d, f) are the year-to-year variability of

73 normalized principal components (PCs) of the three spatiotemporal patterns.

74

75



### GPCC Precipitation

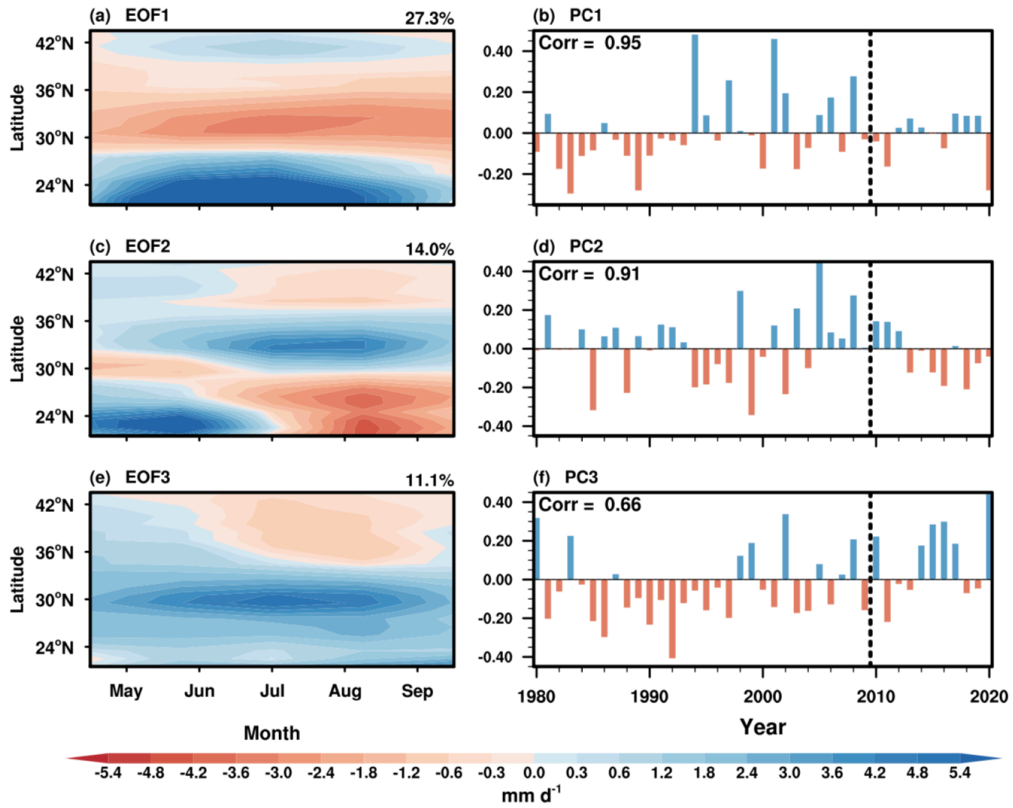

76

77 **Supplementary Figure 3.** Same as Supplementary Fig. 2, but for the GPCC.

78

### CMAP Precipitation

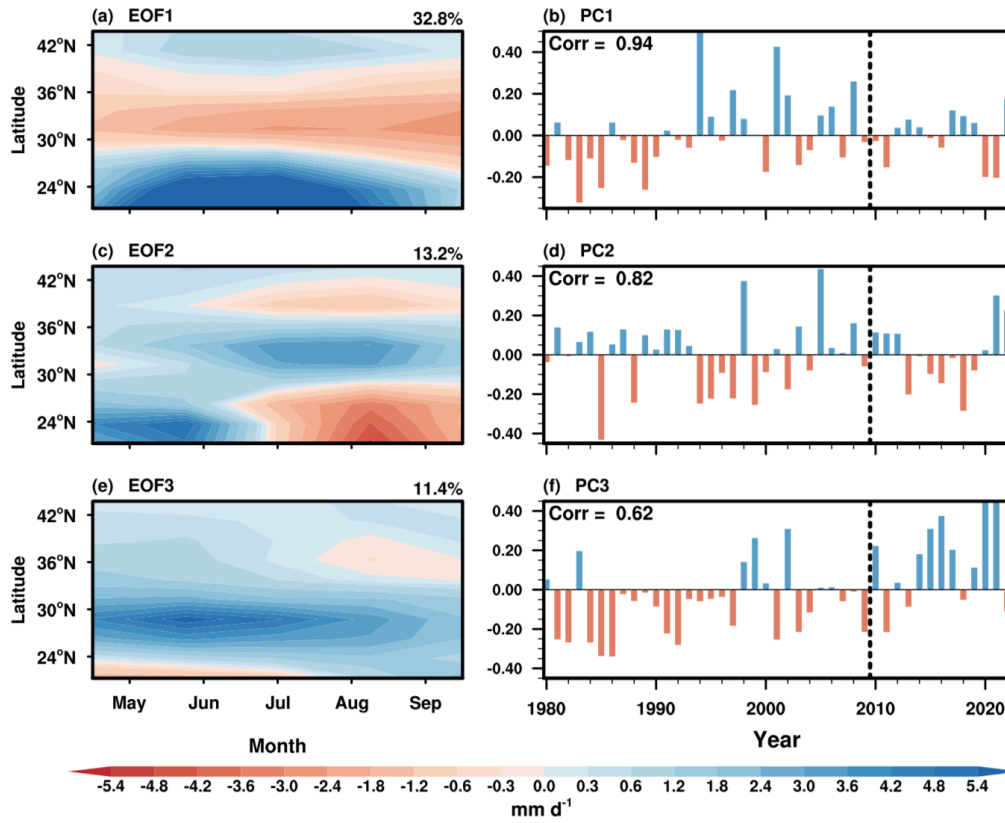

79

80 **Supplementary Figure 4.** Same as Supplementary Fig. 2, but for the CMAP.

81

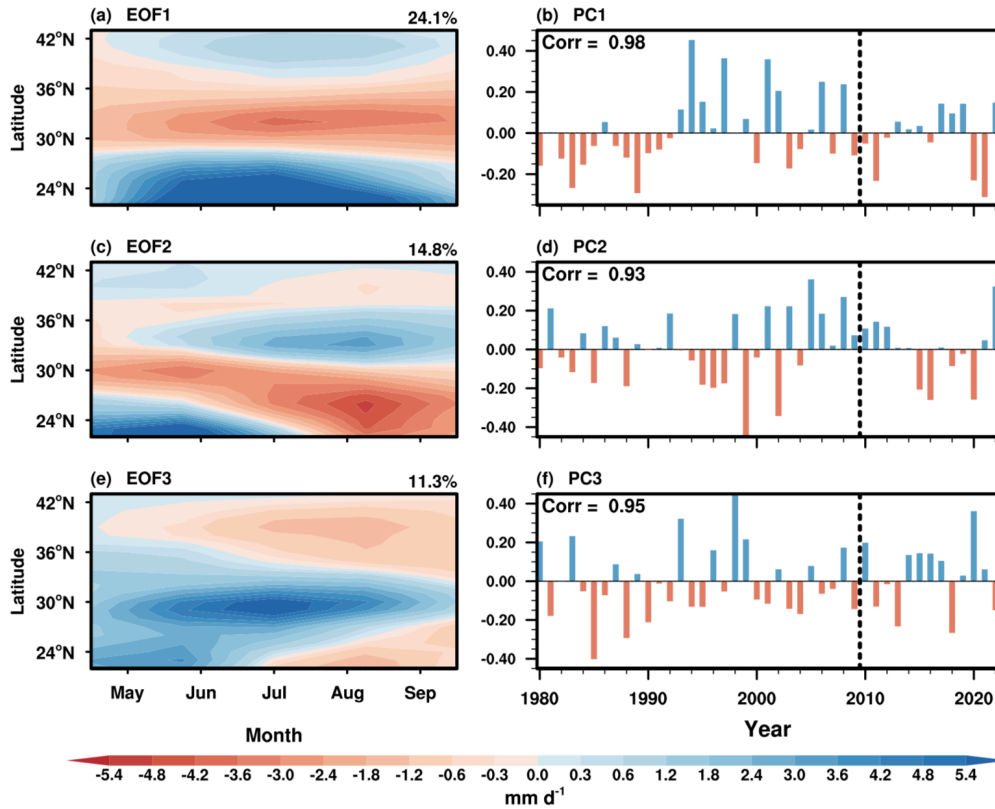

82

83 **Supplementary Figure 5.** Same as Supplementary Fig. 2, but for the monthly station-based  
 84 precipitation.

85

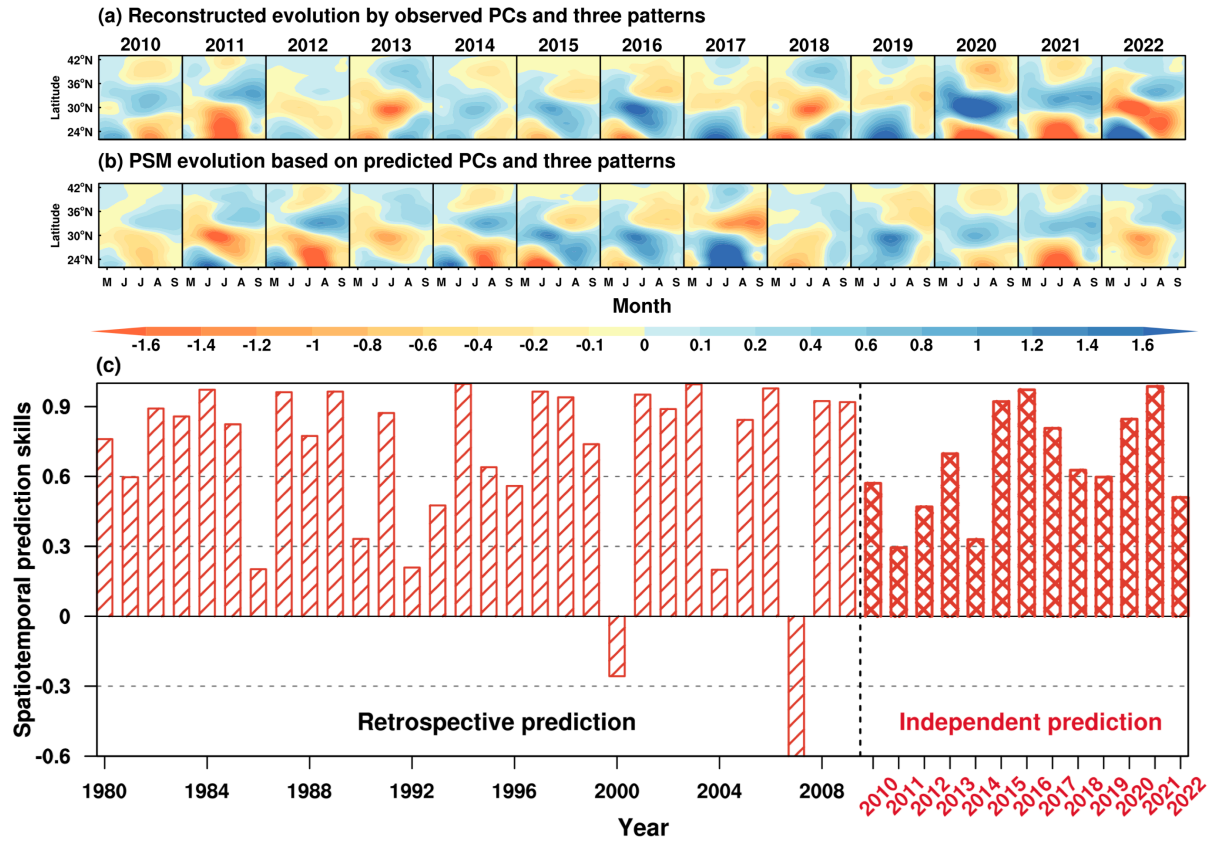

86

87 **Supplementary Figure 6. Prediction skills of spatiotemporal evolution based on the three**

88 **spatiotemporal patterns of East-Asian rainfall anomalies in the physical-statistical**

89 **prediction model. (a) The observed spatiotemporal evolution using the three spatiotemporal**

90 **patterns in the independent prediction period. (b) The predicted spatiotemporal evolution**

91 **reconstructed from the three spatiotemporal patterns and their predicted principal components**

92 **(PCs) in the independent prediction period. The ordinate is latitude and the abscissa is day of boreal**

93 **summer in each year. (c) The prediction skills are assessed by the spatiotemporal pattern**

94 **correlation between the predicted and observed spatiotemporal evolution only based on the three**

95 **patterns in each boreal summer. The black vertical line separates the retrospective prediction skills**

96 **in the training period of 1980–2009 from the independent prediction skills in the period of 2010–**

97 **2022.**

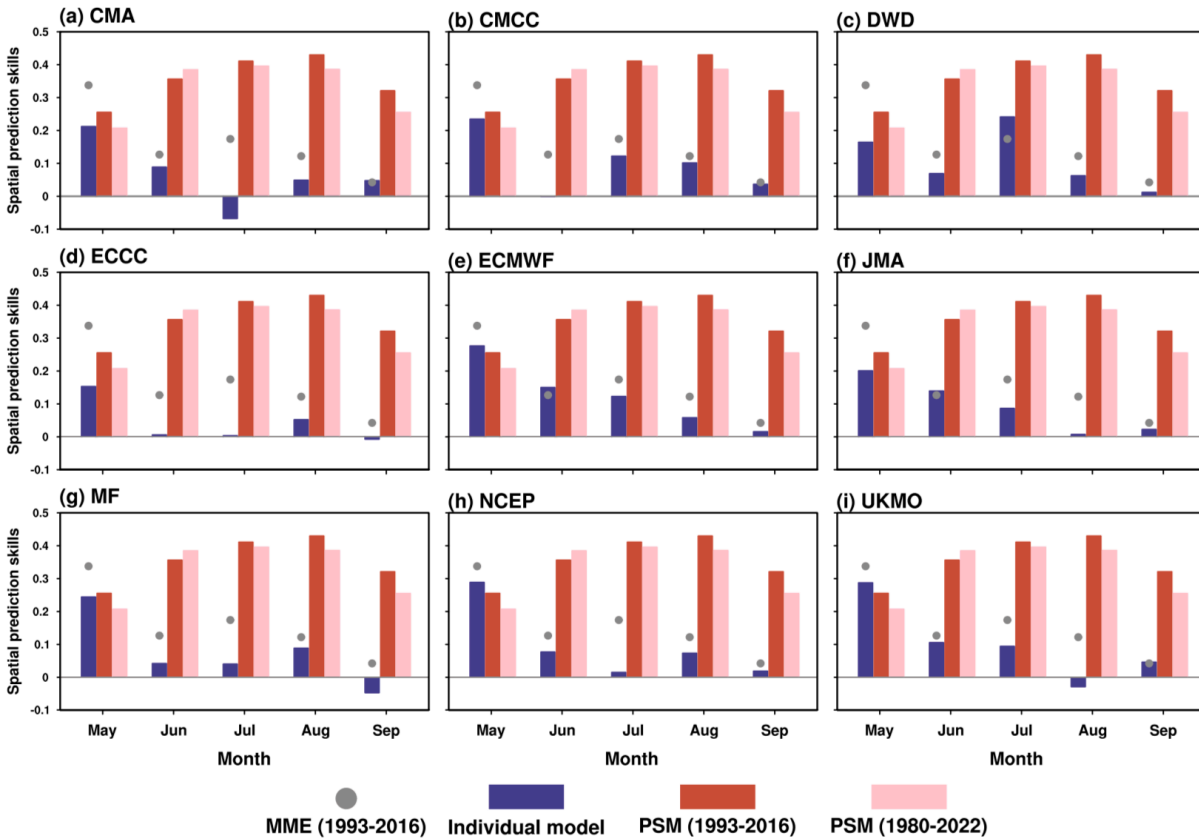

98  
99 **Supplementary Figure 7. Prediction skills for individual dynamical models.** Multi-year mean

100 forecast skills of the spatial pattern correlation against the total rainfall anomalies in individual  
 101 months for each dynamical model and the physical-statistical prediction model (PSM). Grey dots  
 102 indicate the multi-model ensemble (MME) mean forecast skill during 1993–2016 derived from  
 103 nine dynamical models. The blue, red, and pink bars represent the prediction skills of the individual  
 104 dynamical model (1993–2016), PSM (1993–2016), and PSM (1980–2022), respectively.

105

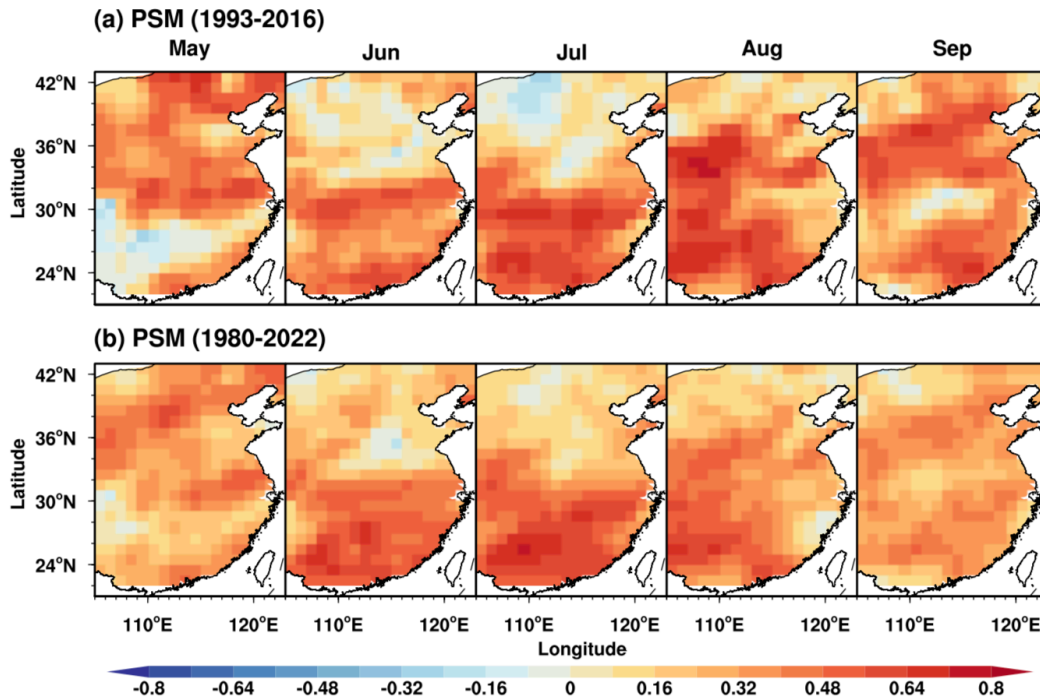

106  
 107 **Supplementary Figure 8. Seasonal prediction skills for the spatiotemporal evolution of**  
 108 **rainfall anomalies over East Asia.** The forecast skills of temporal correlation against total  
 109 observed anomalies of monthly and spatial rainfall anomalies in boreal summer using the physical-  
 110 statistical prediction model (PSM) during (a)1993–2016 and (b) 1980–2022.

111

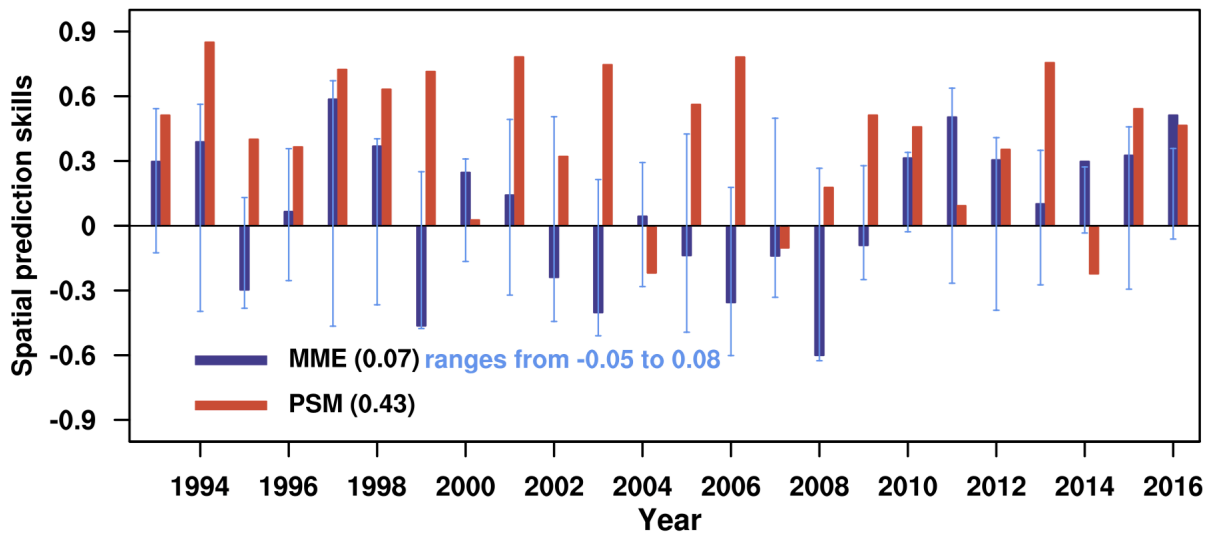

112  
 113 **Supplementary Figure 9. Prediction skills of summer rainfall anomalies over continental**  
 114 **East Asia.** The prediction skills of spatial pattern correlation against the observed summer rainfall  
 115 anomalies predicted by the multi-model ensemble (MME) mean of the dynamical models and the  
 116 physical-statistical prediction model (PSM). The multi-year mean prediction skills during 1993–  
 117 2016 for the MME and PSM are 0.07 and 0.43, respectively. The blue line segments represent the  
 118 ranges of prediction skills derived from individual dynamical models.

119

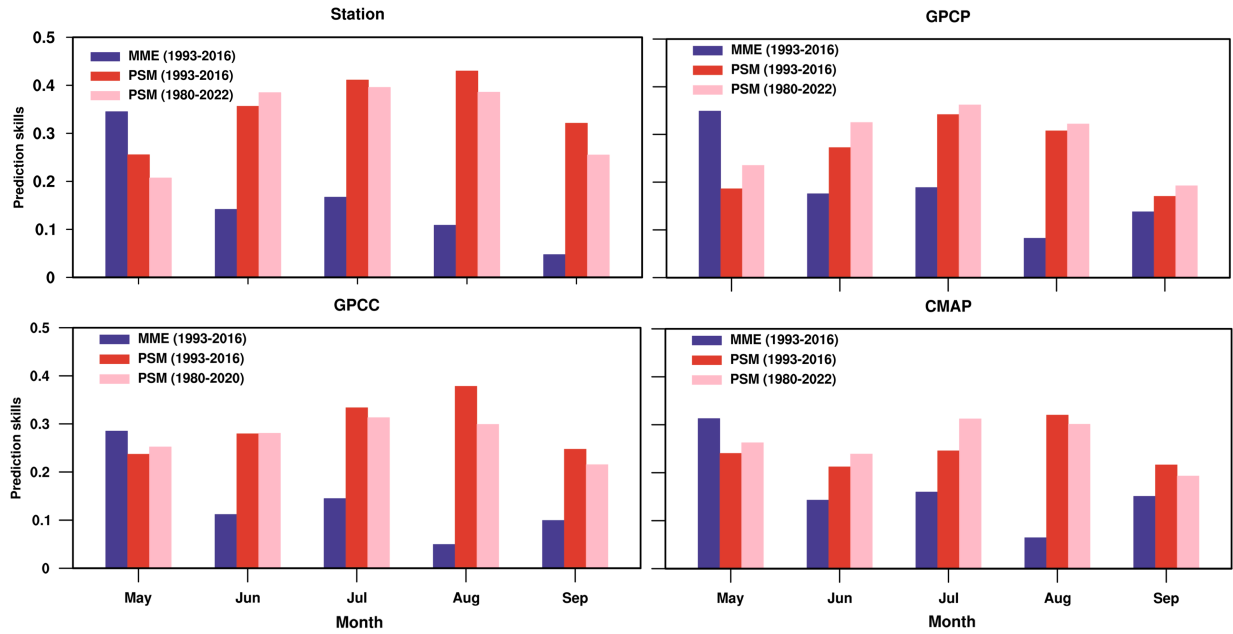

120  
121  
122  
123  
124  
125  
126  
127

**Supplementary Figure 10. Prediction skills against the observed spatiotemporal evolution of East-Asian rainfall anomalies in individual months.** The multi-year mean forecast skills of the spatial pattern correlation against the total rainfall anomalies in each month during 1993–2016 in the multi-model ensemble (MME) mean of the dynamical models and the physical-statistical prediction model (PSM), based on different observation datasets. The abscissa represents the months of May through September.









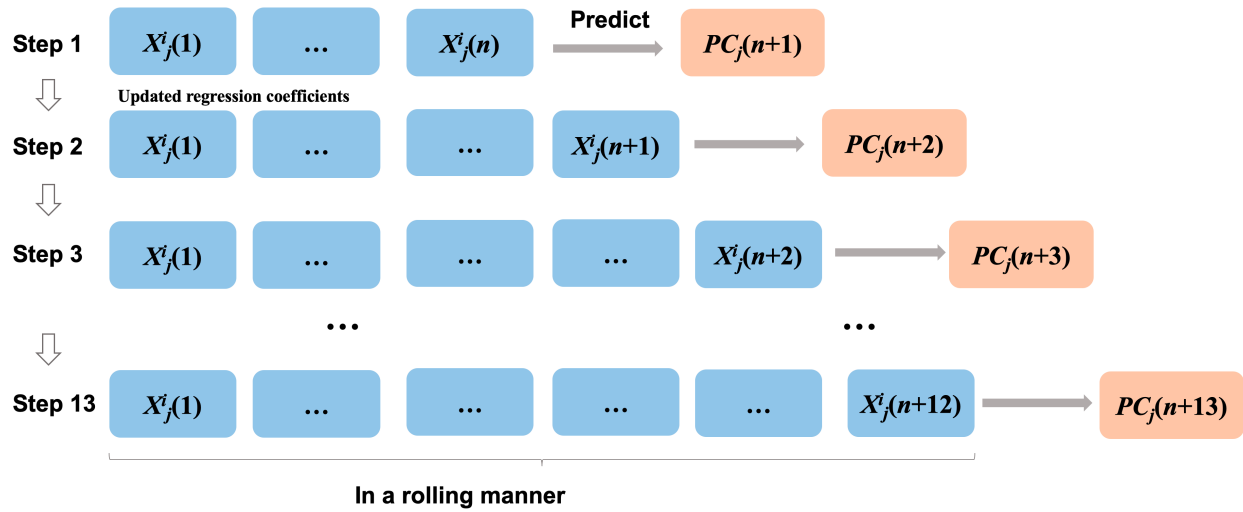

150  
 151 **Supplementary Fig. 14. Schematic diagram of the independent retrospective prediction in a**  
 152 **forward rolling manner.** The independent prediction is based on the three multi-regression  
 153 models derived from each  $PC_j$  ( $j = 1, 2, 3$ ) and their two precursors ( $X_j^i$ ,  $i = 1, 2$ ).

154 **Supplementary References**

- 155 1. Ren, H.-L. et al. Prediction of primary climate variability modes at the Beijing Climate Center. *J. Meteor.*  
156 *Res.* **31**, 204–223 (2017).
- 157 2. Gualdi, S. et al. The new CMCC operational seasonal prediction system. Technical Note TN0288 (Centro  
158 Euro-Mediterraneo sui Cambiamenti Climatici, 2020).
- 159 3. Fröhlich, K. et al. The German climate forecast system: GCFS. *J. Adv. Model Earth Syst.* **13**,  
160 e2020MS002101 (2021).
- 161 4. Lin, H. et al. The Canadian Seasonal to Interannual Prediction System version 2.1 (CanSIPSv2.1). Technical  
162 Note. [https://collaboration.cmc.ec.gc.ca/cmc/cmci/product\\_guide/docs/tech\\_notes/technote\\_cansips-](https://collaboration.cmc.ec.gc.ca/cmc/cmci/product_guide/docs/tech_notes/technote_cansips-210_e.pdf)  
163 [210\\_e.pdf](https://collaboration.cmc.ec.gc.ca/cmc/cmci/product_guide/docs/tech_notes/technote_cansips-210_e.pdf) (Environment and Climate Change Canada, 2021).
- 164 5. Johnson, S. J. et al. SEAS5: the new ECMWF seasonal forecast system. *Geosci. Model Dev.* **12**, 1087–1117  
165 (2019).
- 166 6. Hirahara, S. et al. Japan Meteorological Agency/Meteorological Research Institute Coupled Prediction  
167 System version 3 (JMA/MRI-CPS3). *J. Meteor. Soc. Japan* **101**, 149–169 (2023).
- 168 7. Batté, L., Dorel, L., Ardilouze, C. & Guérémy, J.-F. Documentation of the Meteo-France seasonal  
169 forecasting system 8. <http://www.umr-cnrm.fr/IMG/pdf/system8-technical.pdf> (Meteo France, 2021)
- 170 8. Saha, S. et al. The NCEP climate forecast system version 2. *J. Clim.* **27**, 2185–2208 (2014).
- 171 9. MacLachlan, C. et al. Global Seasonal forecast system version 5 (GloSea5): A high-resolution seasonal  
172 forecast system. *Quart. J. Roy. Meteor. Soc.* **141**, 1072–1084 (2015).
- 173 10. Ma, J. R. et al. Pushing the boundary of seasonal prediction with the lever of varying annual cycles. *Sci.*  
174 *Bull.* **68**, 105–116 (2023).
- 175 11. Wu, R. G. & Kirtman B. P. Observed relationship of spring and summer East Asian rainfall with winter and  
176 spring Eurasian snow. *J. Clim.* **20**, 1285–1304 (2007).
- 177 12. Lee, S. S., Seo, Y. W., Ha, K. J. & Jhun, J. G. Impact of the western North Pacific subtropical high on the  
178 East Asian monsoon precipitation and the Indian Ocean precipitation in the boreal summertime. *Asia-Pac.*  
179 *J. Atmos. Sci.* **49**, 171–182 (2013).
- 180 13. Webster, P. J. & Yang, S. Monsoon and ENSO: Selectively interactive systems. *Q. J. R. Meteorol. Soc.* **118**,  
181 877–926 (1992).
- 182 14. Adler, R. et al. The Global Precipitation Climatology Project (GPCP) monthly analysis (new version 2.3)  
183 and a review of 2017 global precipitation. *Atmosphere* **9**, 138 (2018).
- 184 15. Xie, P. & Arkin, P. Global precipitation: a 17-year monthly analysis based on gauge observations, satellite  
185 estimates, and numerical model outputs. *Bull. Amer. Meteor. Soc.* **78**, 2539–2558 (1997).
- 186 16. Schneider, U. et al. Evaluating the hydrological cycle over land using the newly-corrected precipitation  
187 climatology from the Global Precipitation Climatology Centre (GPCC). *Atmosphere* **8**, 52 (2017).
- 188
