# Supplementary material for: Skillful seasonal predictions of continental East-Asian summer rainfall by integrating its spatio-temporal evolution
Source: PubMed Central journal article supplement — Nat Commun. 2025 Jan 3;16:273. doi: 10.1038/s41467-024-55271-1 (PMC11699286; doi:10.1038/s41467-024-55271-1), 2025-01-03
Supplement: 41467_2024_55271_MOESM2_ESM.pdf [file 41467_2024_55271_MOESM2_ESM.pdf]

# Skillful Seasonal Predictions of Continental East-Asian Summer Rainfall by Integrating its Spatio-Temporal Evolution

Corresponding Author: Dr Hongli Ren

**This file contains all reviewer reports in order by version, followed by all author rebuttals in order by version.**

**Attachments originally included by the reviewers as part of their assessment can be found at the end of this file.**

Version 0:

Reviewer comments:

Reviewer #1

(Remarks to the Author)

Review of "Skillful Seasonal Predictions of East Asian Summer Rainfall by Integrating its Spatio-Temporal Evolution" by Ma et al.

As well known, it is quite difficult to reasonably predict flooding-season rainfall anomalies as a seasonal mean in the East Asian monsoon region because of the complex features in the monsoonal precipitation and its complicated multi-precursors from worldwide. It would be more difficult for current community to capture seasonal evolution of the summer rainfall anomalies in the continental area of East Asia due to the unique characteristics of stepwise meridional advances and retreats of main rainbelt during boreal summer. However, this study creates a new way toward skillful seasonal predictions of the East-Asian summer rainfall in continent for both summer mean and evolution through garnering the highly predictable signals from space and time. The authors have highlighted the key role of the primary spatiotemporal evolution patterns of rainfall anomalies in extracting their major features and main precursors. Based on their-proposed innovative physical-statistical model, the results show an amazing advancement of the East-Asian summer rainfall prediction, compared with the current most-advanced international multi-model ensemble. I would like to recommend its publication in Nature Communication after some necessary revisions and clarifications.

Comments:

- (1) Many previous researches have made big progresses in the summer rainfall prediction over East Asia, but prediction skills distribute mostly in ocean and much less or none in continent. The most extractive thing in this paper, in my opinion, is the impressive positive prediction skills of summer rainfall anomalies over the continental area within East Asia. I strongly suggest that the key word "continental" should appear in the title and abstract as well as the main text. This will make the distinct contribution of this research clearer for both the community and public readers.
- (2) The precursors don't have to be physically connected with the East-Asian rainfall even though they have been effectively employed in the physical-statistical model. Behind the precursors, what climate phenomena mainly contribute to the high predictability of those spatiotemporal patterns in support of the skillful predictions? For example, El Niño-Southern Oscillation (ENSO) has been well recognized as a useful physical precursor and whether it can be indicated in the new prediction model?
- (3) In previous studies, the North Atlantic Oscillation (NAO) has been an effective precursor for the East-Asian summer monsoon, which might be also useful for summer rainfall prediction. I wonder whether there is some signal as precursor from the North Atlantic region which is excluded in Figure 3? Also, it is wondered whether the precursors defined by sea level pressure are all independent on those defined by surface air temperature?
- (4) In most years, the new method has shown much improved results as seen in Figure 4a. However, how can the completely wrong case in the 2007 summer be explained with the new method? Is there the certain weakness of the newly proposed physical-statistical model under some specific situation?
- (5) To better represent "skillful", the quantitative skill score should be mentioned in Abstract.
- (6) The introduction of the section "Precursors for year-to-year variations of the spatiotemporal patterns" looks too long and shows too many details which may not be necessary in the journal.
- (7) Some related references on seasonal prediction of East Asian climate:  
Wu, Z., and P. Zhang, 2015: Interdecadal Variability of the mega-ENSO-NAO Synchronization in Winter. *Climate Dyn.*, 45, 1117-1128.  
Wu, Z., and J. Li, 2008: Prediction of the Asian-Australian monsoon interannual variations with the grid-point atmospheric

model of IAP LASG (GAMIL). Adv. Atmos. Sci., 25(3), 387-394.

Zhang, P., Z. Wu and R. Jin 2021: How can the winter North Atlantic Oscillation influence the early summer precipitation in Northeast Asia: effect of the Arctic sea ice. Climate Dyn., DOI: 10.1007/s00382-020-05570-2.

Wu, Z. and H. Lin, 2012: Interdecadal Variability of the ENSO-North Atlantic Oscillation Connection in boreal summer. Quart. J. Roy. Meteor. Soc., 138, 1668-1675.

Jin, R., Z. Wu\* and P. Zhang, 2018: Tibetan Plateau Capacitor Effect during the Summer preceding ENSO: from the Yellow River climate perspective. Climate Dyn., 51(1), 57-71.

Wu, Z., and L. Yu, 2016: Seasonal Prediction of the East Asian Summer Monsoon with a Partial-least Square Model. Climate Dyn., 46, 3067-3078.

Reviewer #2

(Remarks to the Author)

Please see attached report

Version 1:

Reviewer comments:

Reviewer #1

(Remarks to the Author)

I am satisfied with the revisions and have no further comments.

Reviewer #2

(Remarks to the Author)

The authors have satisfactorily addressed all points/questions raised, and therefore I recommend the publication of this article.

**Open Access** This Peer Review File is licensed under a Creative Commons Attribution 4.0 International License, which permits use, sharing, adaptation, distribution and reproduction in any medium or format, as long as you give appropriate credit to the original author(s) and the source, provide a link to the Creative Commons license, and indicate if changes were made.

In cases where reviewers are anonymous, credit should be given to 'Anonymous Referee' and the source.

The images or other third party material in this Peer Review File are included in the article's Creative Commons license, unless indicated otherwise in a credit line to the material. If material is not included in the article's Creative Commons license and your intended use is not permitted by statutory regulation or exceeds the permitted use, you will need to obtain permission directly from the copyright holder.

To view a copy of this license, visit <https://creativecommons.org/licenses/by/4.0/>



1 **Responses to reviewers' comments and suggestions about the manuscript, entitled**  
2 **“Skillful Seasonal Predictions of Continental East-Asian Summer Rainfall by Integrating**  
3 **its Spatio-Temporal Evolution”**

4 **Response to Reviewer #1's Comments:**

5  
6 Review of “Skillful Seasonal Predictions of East Asian Summer Rainfall by Integrating its  
7 Spatio-Temporal Evolution” by Ma et al.

8 As well known, it is quite difficult to reasonably predict flooding-season rainfall anomalies as  
9 a seasonal mean in the East Asian monsoon region because of the complex features in the  
10 monsoonal precipitation and its complicated multi-precursors from worldwide. It would be  
11 more difficult for current community to capture seasonal evolution of the summer rainfall  
12 anomalies in the continental area of East Asia due to the unique characteristics of stepwise  
13 meridional advances and retreats of main rainbelt during boreal summer. However, this study  
14 creates a new way toward skillful seasonal predictions of the East-Asian summer rainfall in  
15 continent for both summer mean and evolution through garnering the highly predictable signals  
16 from space and time. The authors have highlighted the key role of the primary spatiotemporal  
17 evolution patterns of rainfall anomalies in extracting their major features and main precursors.  
18 Based on their-proposed innovative physical-statistical model, the results show an amazing  
19 advancement of the East-Asian summer rainfall prediction, compared with the current most-  
20 advanced international multi-model ensemble. I would like to recommend its publication in  
21 Nature Communication after some necessary revisions and clarifications.

22 **Response:** We greatly appreciate your positive and insightful comments. We have carefully  
23 addressed all the specific issues raised and fully incorporated your suggestions in the revision.  
24 Below are our point-by-point responses - “blue font” for the reviewer’s original comments and  
25 “black font” for our responses. Please note that the line numbers highlighted in bold correspond  
26 to the clean version of the revised manuscript.

27  
28 **Comments:**

29 1) Many previous researches have made big progresses in the summer rainfall prediction over  
30 East Asia, but prediction skills distribute mostly in ocean and much less or none in continent.  
31 The most extractive thing in this paper, in my opinion, is the impressive positive prediction  
32 skills of summer rainfall anomalies over the continental area within East Asia. I strongly  
33 suggest that the key word “continental” should appear in the title and abstract as well as the  
34 main text. This will make the distinct contribution of this research clearer for both the  
35 community and public readers.

36 **Response:** Thanks for the suggestion. We have added the key word “continental” to the title  
37 and abstract in the revised manuscript as follows:

- 38 • Title: “*Skillful Seasonal Predictions of Continental East-Asian Summer Rainfall by*  
39 *Integrating its Spatio-Temporal Evolution.*”  
40 • Abstract: “*Current models, however, face significant difficulties in predicting the summer*  
41 *mean rainfall anomaly over continental East Asia.*”

- Abstract: “Here we garner power from integrating the rainfall’s spatial and temporal evolutions to identify the most crucial spatiotemporal patterns intrinsic to continental East-Asian rainfall anomalies.”

We have also added “continental” to the main text in the revision.

2) The precursors don’t have to be physically connected with the East-Asian rainfall even though they have been effectively employed in the physical-statistical model. Behind the precursors, what climate phenomena mainly contribute to the high predictability of those spatiotemporal patterns in support of the skillful predictions? For example, El Niño-Southern Oscillation (ENSO) has been well recognized as a useful physical precursor and whether it can be indicated in the new prediction model?

**Response:** Thanks for the comment and question. As shown in Supplementary Table 2, the precursors identified in our study are linked to climate phenomena across the Pacific Ocean, Indian Ocean, Tibetan Plateau, and Mascarene regions, and are associated with well-recognized climate signals in previous studies, such as ENSO and Tibetan Plateau snow depth. As you expected, ENSO is reflected in the precursor related to the year-to-year variability of the third spatiotemporal pattern (Fig. 3d in the revised manuscript), contributing to the skillful predictions. As summarized in Supplementary Table 2, the precursor of EPT shown in Fig. 3d exhibit a strong correlation with ENSO (0.96), while other precursors correlations with other recognized climate signals are relatively lower (less than 0.6). This indicates that the precursors identified in our study not only capture the well-known climate signals like ENSO, but also reveal additional climate factors that influence the year-to-year variation in the seasonal evolution of rainfall anomalies, which cannot be fully explained by the previously recognized climate signals. In the revision, we have added related description as follows: “As summarized in Supplementary Table 2, these precursors have good correlations with the climate variability modes, such as El Niño-Southern Oscillation (ENSO), which are well recognized as important drivers of East-Asian monsoon rainfall variations through ocean-land-atmospheric feedbacks.” (Please see lines 161-165)

The objective of this study is to demonstrate that our proposed physical-statistical prediction model outperforms the MME mean forecast in predicting the seasonal evolution of East-Asian rainfall anomalies for individual years. Toward achieving this, we have identified the main and representative precursors that contribute to the improved predictions of seasonal rainfall evolution. Inspired by your nice comment, we plan to further investigate the dynamic and physical mechanisms underlying the influence of these precursors on seasonal rainfall evolution through a series of climate diagnoses and model simulations in the next step.

3) In previous studies, the North Atlantic Oscillation (NAO) has been an effective precursor for the East-Asian summer monsoon, which might be also useful for summer rainfall prediction. I wonder whether there is some signal as precursor from the North Atlantic region which is excluded in Figure 3? Also, it is wondered whether the precursors defined by sea level pressure are all independent on those defined by surface air temperature?

**Response:** Thanks for your insightful comment. As shown in the figure below (Fig. R1), the predictable signal from the North Atlantic region is primarily reflected in the representative precursors associated with the year-to-year PC1 (principal component) variation (Figs. R1a and

86 R1b). This indicates that the **North Atlantic Oscillation (NAO) mainly contributes to the**  
 87 **year-to-year variation of the persistent evolving pattern**, with the predictable information  
 88 contained within the first two precursors identified in this study.

89 Due to the mutual independence of the three spatiotemporal patterns obtained using the  
 90 empirical orthogonal function (EOF) method, the criterion for precursor search only requires  
 91 that the two precursors associated with each PC variation be independent of each other.  
 92 Therefore, the **two precursors defined by sea level pressure and surface air temperature**  
 93 **for each PC variation are reasonably regarded as independent in this study**. We have  
 94 added the explanation on this in the revision. (Please see **lines 132-133, 138-141, 149-151**)  
 95

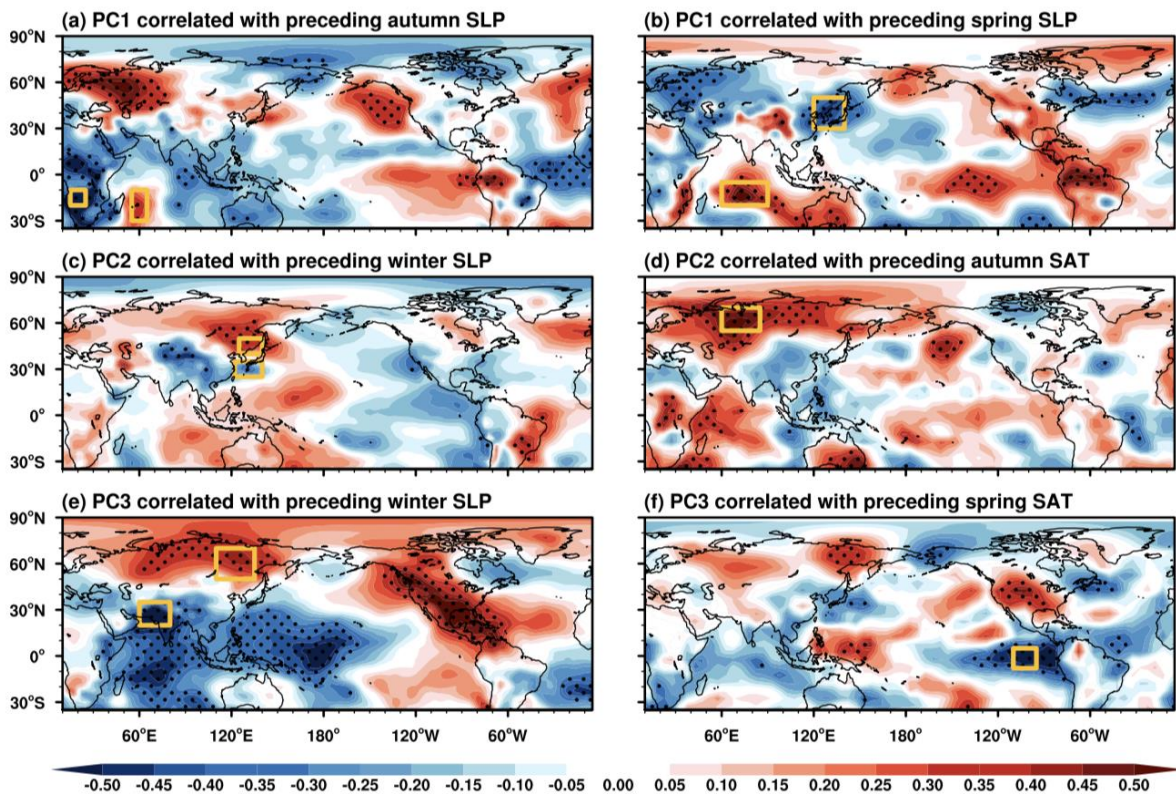

96  
 97 **Fig. R1 The correlation maps between year-to-year variations of principle components**  
 98 **(PCs) and sea level pressure (SLP) or surface air temperature (SAT) anomalies**. The  
 99 correlation maps of yearly PC1 variation and SLP anomalies in (a) preceding autumn and (b)  
 100 preceding spring. The correlation coefficients of PC2 variation with (c) SLP anomalies in  
 101 preceding winter and (d) SAT anomalies in preceding autumn. The correlation maps of PC3  
 102 variation with (e) SLP anomalies in preceding winter and (f) SAT anomalies in preceding spring.  
 103 Significant values marked by black dots exceed the 90% confidence level. The yellow boxes  
 104 outline the regions used for defining precursors in Table 1.

105  
 106 4) In most years, the new method has shown much improved results as seen in Figure 4a.  
 107 However, how can the completely wrong case in the 2007 summer be explained with the new  
 108 method? Is there the certain weakness of the newly proposed physical-statistical model under  
 109 some specific situation?



110 **Response:** Thanks for pointing this out. The newly proposed physical-statistical model has  
111 certain limitations in the following situations. When the amplitudes of the precursors are too  
112 weak, the model may struggle to accurately capture the predictable signals effectively, resulting  
113 in increased forecast uncertainty. Additionally, when applied to more stochastic event  
114 occurrences, the model's performance may be limited due to the inherent complexity and rapid  
115 variability of these events, which require further considerations of their localized and transient  
116 nature. We have added related discussions in the revised manuscript as follows: "*The new model*  
117 *may have certain limitations when the amplitudes of the precursors are too weak or when*  
118 *applied to more stochastic event occurrences. In these cases, it may struggle to capture slowly*  
119 *predictable signals due to the inherent complexity or rapid variability.*" (Please see **lines 266-**  
120 **269**)  
121

122 5) To better represent "skillful", the quantitative skill score should be mentioned in Abstract.  
123 **Response:** Thanks for your suggestion. We have added the quantitative skill to Abstract in the  
124 revised manuscript as follow: "*This innovative model, with the non-conventional predictands*  
125 *implicitly spanning spatiotemporal dimensions, demonstrates a prediction skill of 0.51 at least*  
126 *twice as high as that of the best dynamical models available (0.26), indicating improved*  
127 *predictions for both the spatiotemporal evolution and summer mean of rainfall anomalies*".  
128 (Please see **lines 29-30**)  
129

130 6) The introduction of the section "Precursors for year-to-year variations of the spatiotemporal  
131 patterns" looks too long and shows too many details which may not be necessary in the journal.  
132 **Response:** Thanks for your valuable suggestion regarding this section. In the revised  
133 manuscript, we have simplified this section by removing unnecessary details while ensuring  
134 that the essential concepts related to the precursors remain clear. (Please see **lines 124-170**)  
135

136 7) Some related references on seasonal prediction of East Asian climate:  
137 Wu, Z., and P. Zhang, 2015: Interdecadal Variability of the mega-ENSO-NAO Synchronization  
138 in Winter. *Climate Dyn.*, 45, 1117-1128.  
139 Wu, Z., and J. Li, 2008: Prediction of the Asian-Australian monsoon interannual variations with  
140 the grid-point atmospheric model of IAP LASG (GAMIL). *Adv. Atmos. Sci.*, 25(3), 387-394.  
141 Zhang, P., Z. Wu and R. Jin 2021: How can the winter North Atlantic Oscillation influence the  
142 early summer precipitation in Northeast Asia: effect of the Arctic sea ice. *Climate Dyn.*, DOI:  
143 10.1007/s00382-020-05570-2.  
144 Wu, Z. and H. Lin, 2012: Interdecadal Variability of the ENSO-North Atlantic Oscillation  
145 Connection in boreal summer. *Quart. J. Roy. Meteor. Soc.*, 138, 1668-1675.  
146 Jin, R., Z. Wu\* and P. Zhang, 2018: Tibetan Plateau Capacitor Effect during the Summer  
147 preceding ENSO: from the Yellow River climate perspective. *Climate Dyn.*, 51(1), 57-71.  
148 Wu, Z., and L. Yu, 2016: Seasonal Prediction of the East Asian Summer Monsoon with a  
149 Partial-least Square Model. *Climate Dyn.*, 46, 3067-3078.

150 **Response:** We greatly appreciate your suggestion. To provide a more comprehensive overview  
151 and analysis, we have carefully reviewed and incorporated most of these references, along with  
152 additional literature, into the Introduction and Discussion sections in the revised manuscript.  
153

154 **Response to Reviewer #2's Comments:**

155

156 Review of “Skillful Seasonal Predictions of East Asian Summer Rainfall by Integrating its  
157 Spatio-Temporal Evolution”.

158 This paper shows results on the prediction of the spatio-temporal evolution of rainfall within  
159 the summer monsoon season over East Asia. The authors propose a new statistical dynamical  
160 model to predict the spatial-temporal evolution of rainfall during the summer monsoon season  
161 over East Asia and argue that their proposed model supersedes the current dynamical prediction  
162 systems that are used operationally.

163 While I agree with the authors that we need models that can predict not only the magnitude of  
164 seasonal mean rainfall but also more detailed characteristics like the progression or retreat of  
165 monsoon, I have several major concerns requiring further clarification, particularly the  
166 distinction between the spatial distribution of monsoon rainfall and spatiotemporal evolution of  
167 monsoon rain. In summary, this paper requires significant revisions to clarify its objectives,  
168 strengthen the analysis, and address questions raised before it can be considered for publication.

169 **Response:** We greatly appreciate your insightful comments. These comments and suggestions  
170 are quite valuable for improving our manuscript and have been fully incorporated in the revision.  
171 We have substantially revised the manuscript by adding additional observational and dynamical  
172 model evidences and by strengthening the analysis and manuscript structure to better clarify  
173 this study’s objective of improving the seasonal predictions in the spatiotemporal evolution of  
174 rainfall anomalies over continental East Asia. Below are our point-by-point responses - “blue  
175 font” for the reviewer’s original comments and “black font” for our responses. The line numbers  
176 highlighted in bold are based on the clean version of the revised manuscript.

177

178 **Major comments:**

179 1) There is confusion about the terminology and the question that the authors are trying to  
180 address in this paper. The paper is targeted toward the prediction of the spatio-temporal  
181 evolution of monsoon anomalies (lines 77-81) however most of the analysis and arguments are  
182 around models’ ability to capture the spatial distribution of monsoon mean rainfall anomalies.  
183 To me, these are two different things. The first one refers to the spatial distribution of monsoon  
184 rain, e.g. analysis done in Fig. 1 and 2, and most of the statistical analysis focuses on the spatial  
185 pattern of monsoon mean rainfall (JJA) or interannual variability. The spatio-temporal  
186 evolution implies to me, the progression and retreat of monsoon during/within the monsoon  
187 season and involves intra-seasonal analysis. These two are of course interconnected but distinct  
188 issues and in many places, spatial distribution and spatiotemporal evolution are used  
189 interchangeably. I find it difficult to decipher which issue the authors are trying to address.

190 **Response:** Sorry for bringing the confusion and we have done our best to make it clear. We  
191 agree with you that the spatial patterns at a given instant and the spatiotemporal evolution are  
192 interconnected but distinct features. Our study focuses on the spatiotemporal evolution, which  
193 naturally enables us to examine the spatial pattern at any given instant. To better describe and  
194 clarify the main theme of this study, which is the seasonal prediction of the spatiotemporal  
195 evolution of rainfall anomalies, we have revised original Figs. 1, 4, and 5. As to be elaborated  
196 below, these changes would help demonstrate the novelty of this study, namely skillful



197 prediction of spatial distribution at a given instant is merely a by-product of a skillful prediction  
198 of the spatiotemporal evolution.

- 199 • The revised Fig. 1 shows the seasonal prediction skills of the current dynamical models for  
200 the spatiotemporal evolution of rainfall anomalies over time. It shows that dynamical  
201 models struggle to predict the spatiotemporal evolution of rainfall anomalies over East Asia,  
202 as forecast skills decrease rapidly with increasing forecast lead time.
- 203 • Fig. 2 (unchanged) shows that the spatiotemporal evolution of East-Asian summer rainfall  
204 anomalies, which vary both seasonally and yearly, can be decomposed into three distinct  
205 seasonal spatiotemporal patterns from May to September, each with its own yearly time  
206 series (which are referred to principal components or PCs). We believe this is an innovative  
207 way to describe the spatiotemporal evolution of East-Asian summer rainfall anomalies as it  
208 better captures distinct footprints left by precursory climate signals in the summer rainfall  
209 through synthesizing information from both the time and space dimensions. Specifically,  
210 the sum of the products of the three distinct seasonal spatiotemporal patterns and their yearly  
211 time series can adequately represent the rainfall anomalies both at a given instant and  
212 throughout their slow-varying subseasonal to seasonal evolution.
- 213 • Now the task of predicting the spatiotemporal evolution of East-Asian summer rainfall  
214 anomalies, which vary both seasonally and yearly, ultimately boils down to predicting the  
215 three principal components (PCs). The revised Fig. 4 shows the predictions for the (total)  
216 seasonal spatiotemporal evolution of East-Asian summer rainfall anomalies in each year  
217 and their comparison with the MME mean forecasts. Overall, our prediction skill for the  
218 spatiotemporal evolution over the entire 1993–2016 is nearly twice as high as the  
219 corresponding skill in MME mean.
- 220 • As a by-product of the predictions of the spatiotemporal evolution, we can predict the spatial  
221 patterns of East-Asian summer rainfall anomalies in each month of a given year. The revised  
222 Fig. 5 summaries our mean prediction skills in individual months (May–September) and in  
223 summer mean (JJA). It shows that our predictions outperform those of the MME mean in  
224 capturing the spatial patterns of rainfall anomalies in individual months.

225 We have also added related explanations and discussions in the revised manuscript.

226

227 2) Most analyses presented here focus on spatial patterns using correlation coefficients and,  
228 in my opinion, these results can be very volatile due to multiple factors (decadal variability,  
229 model hindcast period, independent models, and large observational uncertainty). For example,  
230 the observations themselves are known to disagree on the spatial pattern, in that case, what is  
231 the truth and what do we expect from the models?

232 **Response:** Thanks for your suggestion regarding the verification. Our understanding of this  
233 comment is that it covers two issues: the robustness of the spatial patterns among observations,  
234 and the spatial pattern correlation between observations and forecasts. Because the Reviewer’s  
235 next comment is more specifically about the spatial patterns using correlation coefficients  
236 between observations and forecasts, we here focus on the robustness of the spatial patterns  
237 among observations and will come back to the issue of the spatial pattern using correlation  
238 coefficients (and the robustness of prediction skills) when replying to the next comment.

239 In this study, we utilized all available 43 years of daily rain gauge data to capture three  
240 relatively stable spatiotemporal patterns of seasonal rainfall anomalies and their yearly time

241 series. In the revision, we also consider three satellite-gauge-based precipitation datasets (GPCP,  
242 CMAP, GPCC). As detailed in new Supplementary Table 3, the GPCP and CMAP datasets are  
243 satellite-gauge merged precipitation datasets, while the GPCC dataset provides global land-  
244 surface precipitation based on the station database from the Global telecommunication System  
245 of the World Meteorological Organization (WMO). These datasets are widely utilized for  
246 monitoring rainfall variations in East Asia and for model validation. These three additional  
247 datasets allow for an examination of the robustness of the results obtained from the 43 years of  
248 daily rain gauge data (usually as real values), including the decadal variability and the impacts  
249 of different datasets on the skill evaluation in both diagnostic and hindcast periods. These data  
250 are monthly mean data and therefore we compare spatiotemporal patterns derived from these  
251 three datasets with those derived from 43 years of daily rain gauge data, aggregated to the  
252 monthly level.

253 The newly added Supplementary Figs. 2-4 show that the spatiotemporal seasonal patterns  
254 from other three observed datasets closely resemble those from station data based on original  
255 daily (Fig. 2 in the main text and Supplementary Fig. 5) and their yearly time series show similar  
256 interannual and decadal variations. Specifically, the correlations of the PC1 (yearly time series  
257 of the spatiotemporal seasonal pattern 1) derived from the three datasets with the rain gauge  
258 data all exceed 0.94; The correlations of the PC2 derived from the three datasets with the rain  
259 gauge data are 0.75, 0.82, and 0.91, respectively whereas the correlations of the PC3 are 0.62,  
260 0.66. and 0.86, respectively. Therefore, the observational uncertainties among different datasets  
261 primarily impact the interannual and decadal variability of PC3 in the spatiotemporal seasonal  
262 pattern, which contributes the least to the variability of seasonal rainfall anomalies. Overall, **the**  
263 **three distinct spatiotemporal patterns and their yearly time series are relatively consistent**  
264 **across the various observation datasets.** These results lend credibility to the original analysis  
265 of spatiotemporal patterns based on station data and further support our original conclusions.  
266 In the revised manuscript, we have reported this finding. (Please see **lines 115-117**)

267

268 3) The authors use gauge data from CMA using land stations and then interpolate the data on  
269 a 1x1 grid to correlate the pattern with the models. The spatial pattern using this data could be  
270 substantially different from the spatial pattern using satellite data, for instance. I think much  
271 more evidence is needed to prove that the proposed statistical-dynamical model is good at  
272 capturing the spatial distribution and evolution of monsoon rainfall. I was also hoping to see  
273 some dynamic diagnostic that could potentially be used to predict the progression or retreat of  
274 East Asian monsoon.

275 **Response:** Thanks for the valuable comments. In the revision, we have confirmed that using  
276 different observational datasets has minimal impact on the spatial pattern correlation between  
277 observations and forecasts (both our forecasts and MME mean forecasts) shown in our original  
278 manuscripts. Specifically, we first repeated the same correlation analysis between the MME  
279 mean forecasts and each of the three additional observational datasets. The results show that  
280 the skill of MME mean forecasts remains largely unchanged regardless of which observational  
281 datasets are used for verification (new Supplementary Fig. 10). Secondly, we repeated the same  
282 procedures for predicting the three yearly time series (i.e., PC1-PC3) derived from each of the  
283 three additional observational datasets using the same predictors for PC1-PC3 derived from the  
284 gauge data. The prediction skills of spatial pattern correlation in our forecasts for each of the

285 three additional observational datasets are also very closed to those shown in the original  
286 manuscript, although the values of correlation skills are slightly smaller (new Supplementary  
287 Fig. 10). Furthermore, the correlation skills of proposed physical-statistical prediction model in  
288 predicting spatial distribution and spatiotemporal evolution of rainfall anomalies remain largely  
289 unchanged when evaluated using these additional observational datasets (please see new  
290 Supplementary Figs. 10-13). Therefore, the conclusion that **our predictions outperform the**  
291 **MME mean forecasts remains valid, regardless of which observational datasets are used**  
292 **for verification**. We have added the explanations on this in the revision. (Please see **lines 234-**  
293 **246**)

294 In this manuscript, we demonstrate that our proposed physical-statistical prediction model  
295 has a better skill than the MME mean forecasts in predicting the seasonal progression or retreat  
296 of East-Asian rainfall anomalies in most years. This improvement is achieved by considering  
297 the spatiotemporal evolution of rainfall anomalies and associated representative precursors that  
298 depict slowly-varying boundary conditions. However, identifying the underlying dynamic and  
299 physical mechanisms responsible for year-to-year variation of the progression or retreat of East  
300 Asian monsoon is beyond the scope of this study, due to the complexity of the atmosphere-  
301 ocean-land interactions. Inspired by your valuable suggestions, we plan to conduct a series of  
302 climate diagnoses and model simulations in a follow-up study to gain insights into these  
303 underlying dynamic and physical mechanisms.

304

305 4) The abstract mentions that the model uses non-conventional predictands, however, the  
306 precursors for inter-annual variation of rainfall are already identified by previous studies as  
307 mentioned in Supp. Table 2. Hence, I find this statement contradictory to the analysis.

308 **Response:** We agree with your that some precursors for inter-annual variation of rainfall, such  
309 as ENSO (as shown in original Fig. 3d), have been identified in previous studies. The innovation  
310 of our model lies in use of the non-conventional **predictands (not predictors)**, namely, the  
311 three spatiotemporal patterns and their principal components (PCs), rather than the  
312 traditionally-used predictands of seasonal mean rainfall anomalies. As stated in our reply to the  
313 comment #1 above, the sum of the products of the three distinct seasonal spatiotemporal  
314 patterns and their yearly time series can adequately represent these anomalies both at a given  
315 instant and throughout their temporal evolution. The better skill is gained through more robust  
316 relationships of these (previously known and the newly identified) precursors with the yearly  
317 time series of the newly identified spatiotemporal patterns. We have added related explanations  
318 in the revised manuscript (please see **lines 263-264**).

319

320 5) I think the authors must consider the role of observational uncertainty leading to poor  
321 correlation values in this analysis.

322 **Response:** Thanks for your suggestion. In the revision, we explicitly document the impact of  
323 the observational uncertainty on the prediction skills regarding the correlation values between  
324 observations and forecasts (see Supplementary Figs. 10-13). Although the skill is slightly lower  
325 when using different satellite-gauge-based datasets, **the results confirm that our predictions**  
326 **still clearly outperform the MME mean forecasts**, as stated in our response to the comment  
327 #3.

328

329 6) My assumption from Fig. 1d is that the authors have calculated PCC for each year, and  
 330 then averaged PCC from each year over the full period. Have the authors tried to calculate the  
 331 PCC for the climatological rainfall anomaly from models and observations? What is the value  
 332 of PCC in that case? Also, JJA mean doesn't give much information about spatiotemporal  
 333 evolution, but rather shows information on monsoon rainfall distribution. It would have been  
 334 better for the authors to look at PCC for each month separately to focus on "evolution".

335 **Response:** The pattern correlation coefficient (PCC) in Fig. 1d represents the similarity of the  
 336 spatial distributions of JJA rainfall anomalies between forecasts and observations in each year  
 337 and is used to quantify the prediction skills of current dynamical models in capturing the spatial  
 338 patterns of summer mean rainfall anomalies. Before calculating the PCC in Fig. 1d, we first  
 339 subtracted the JJA climatology for 1993–2016 from the models and observations to obtain the  
 340 spatial rainfall anomalies, and then calculated the PCC between the spatial distributions of  
 341 predicted and observed rainfall anomalies. Therefore, the climatological rainfall anomalies are  
 342 zero, by definition, in both models and observations.

343 In addition, we also compared the climatological rainfall evolution between MME mean  
 344 of models and observations. As shown in the figure below (Fig. R2), the MME of models are  
 345 not able to capture the spatial and monthly evolution of observed rainfall climatology  
 346 reasonably well, especially in South China, the Yangtze River Basin, and Northeast China.  
 347 Therefore, our PCC calculations have excluded the systematic errors in the MME forecasts, a  
 348 routine approach in the international community. Note that our PSM model is essentially an  
 349 **anomaly model**. Therefore, it is fair to compare the PCC skill of our predictions with that of  
 350 MME forecasts by excluding the systematic errors in the MME forecasts, as the PCC skill of  
 351 MME forecasts would be even lower when including their systematic errors.

352 As noted in Comment #1, we have substantially revised Figs. 1, 4, and 5 and added related  
 353 explanations to better illustrate our improved predictions of the spatiotemporal evolution of  
 354 rainfall anomalies. In particular, the revised Fig. 5a presents the mean prediction skill of PCC  
 355 for each month separately over the entire period.

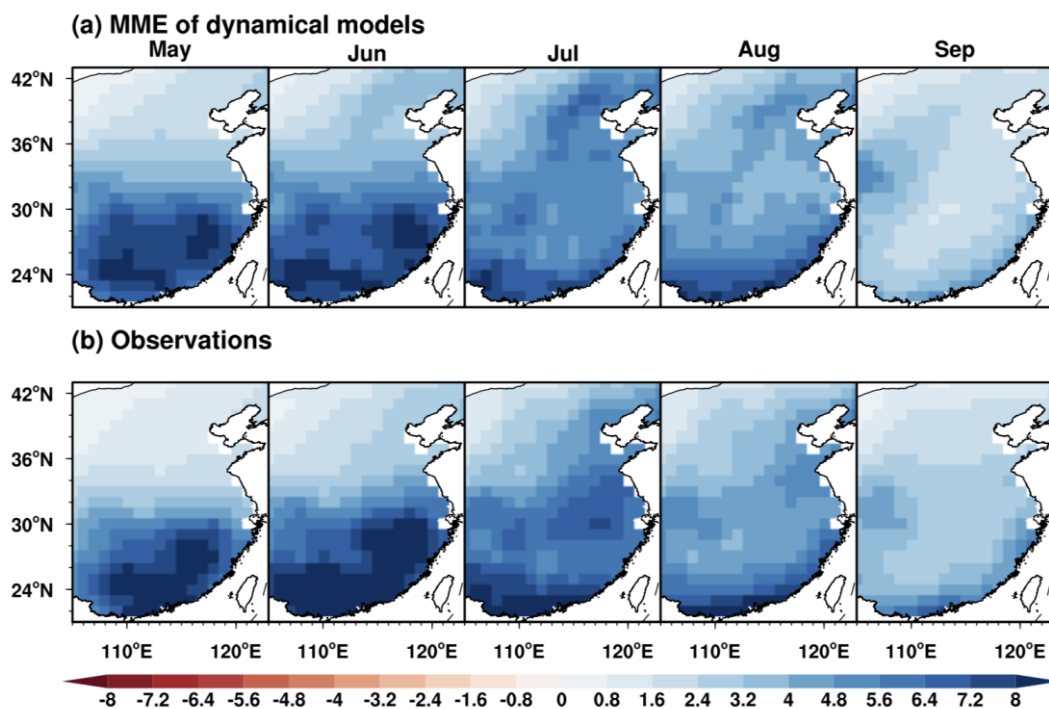

356

357 **Fig. R2** The spatial distribution of climatological rainfall evolution over East Asia during 1993–  
358 2016 based on (a) the multi-model ensemble (MME) mean of the dynamical models, and (b)  
359 observations.

360

361 7) Fig. 1d shows that the models are not consistently bad in predicting the spatial distribution  
362 and there is large year-to-year variability in the ability of models to capture the spatial pattern.  
363 Is there a physical explanation for why the models are good for certain years and bad for others?  
364 For example, in 2016, 2011, 2014, and 1997 the dynamical models perform reasonably well.

365 **Response:** Numerous studies have shown that the ensemble skill of dynamical models in  
366 predicting seasonal rainfall anomalies over East Asia remains very low (e.g., Webster et al.,  
367 1998; Wang et al., 2004, 2015; Sperber et al., 2013; Huang et al., 2018), which is consistent  
368 with the results presented in the original Fig. 1d (now Supplementary Fig. 9). The ensemble  
369 forecast skill is very low in most years and high in only a few years, with large uncertainties in  
370 different models. The shortcomings of current dynamical models for seasonal predictions of  
371 East-Asian rainfall anomalies have been extensively investigated, which is largely attributed to  
372 the key factors such as initialization, the ability to reproduce crucial coupled ocean-atmosphere  
373 processes, and model resolution and performance (e.g., Wang et al., 2003, 2005; Wu et al., 2009;  
374 Zhu et al., 2016; Huang et al., 2018; Wang et al., 2024). We suspect that the good ensemble  
375 skills in a few specific years in the dynamical models may be due to their ability to correctly  
376 catch the information of some important precursors, also used in our PSM model. We have  
377 added related explanations and discussions in the revised manuscript (please see **lines 62-67**).

378 In this study, we merely use the current MME mean forecast as a reference to evaluate the  
379 prediction skill of our PSM model, rather than the variability in the skills of the MME forecasts.  
380 Therefore, a detailed physical explanation for such a variability is not the focus of this paper.  
381 Nevertheless, this is an excellent question, and in future work, we plan to investigate whether  
382 the variability in MME forecast skill is related to the precursors used in our PSM model, with  
383 the aim of providing insights into the limitations of current model capabilities.

384

#### 385 **References:**

- 386 Huang, B., Cubasch, U., & Kadow, C. Seasonal prediction skill of East Asian summer monsoon in  
387 CMIP5 models. *Earth Syst. Dynam.* **9**, 985–997 (2018).
- 388 Sperber, K. R. et al. The Asian summer monsoon: An intercomparison of CMIP5 vs. CMIP3 simulations  
389 of the late 20th century. *Clim. Dyn.* **41**, 2711–2744 (2013).
- 390 Wang, B. et al. Fundamental challenge in simulation and prediction of summer monsoon  
391 rainfall. *Geophys. Res. Lett.* **32**, L15711 (2005).
- 392 Wang, B., Lee, J. Y. & Xiang, B. Q. Asian summer monsoon rainfall predictability: a predictable mode  
393 analysis. *Clim. Dyn.* **44**, 61–74 (2015).
- 394 Wang, B. & Li, T. East Asian monsoon-ENSO interactions [M], East Asian Monsoon. In: Chang, C. P.  
395 Ed. *World Scientific Publishing Company*, 177–212 (2004).
- 396 Wang, B., Wu, R. & Li, T. Atmosphere–warm ocean interaction and its impacts on Asian–Australian  
397 monsoon variation. *J. Clim.* **16**, 1195–1211 (2003).
- 398 Wang, Y. H., He, C., Li, T., Zhang, C. M., & Gu, X. L. Distinctive changes of Asian–African summer  
399 monsoon in interglacial epochs and global warming scenario. *Clim. Dyn.* **62**, 2129–2145 (2024).



400 Webster, P. J. et al. Monsoons: processes, predictability, and the prospects for prediction. *J. Geophys.*  
401 *Res.* **103**, 14451–14510 (1998).  
402 Wu, Z., Wang, B., Li, J. & Jin, F. An empirical seasonal prediction model of the East Asian summer  
403 monsoon using ENSO and NAO. *J. Geophys. Res. Atmos.* **114**, D18120 (2009).  
404 Zhu, Z. & Li, T. A new paradigm for the continental United States summer rainfall variability: Asia–  
405 North America teleconnection. *J. Clim.* **29**, 7313–7327 (2016).

406  
407 8) Again, this is JJA, so figure Fig. 1d essentially captures the spatial distribution of rainfall  
408 during JJA and not the spatiotemporal evolution.

409 **Response:** Thanks again for your reminder. In the revised manuscript, we have replaced the  
410 original Fig. 1 with new Fig. 1 to better illustrate the prediction skills for the spatiotemporal  
411 evolution of rainfall anomalies in the MME mean forecasts, comparing it with our PSM  
412 forecasts (new Supplementary Fig. 8). Additionally, we have revised Figs. 4 and 5 and included  
413 further explanations to clarify our improvements in predicting the spatiotemporal evolution of  
414 rainfall anomalies, as detailed in Comment #1.

415

416 9) Could we have error bars in Fig. 1d, which shows the PCC from individual models and  
417 ensembles?

418 **Response:** Thanks for your suggestion. In the revision, we have added error bars to the original  
419 Fig. 1d (now Supplementary Fig. 9) and revised Fig. 5a to show the spread of PCC skills across  
420 individual models. The results illustrate large differences or uncertainties among individual  
421 models, indicating substantial variability in their ability to predict East-Asian rainfall anomalies  
422 during JJA. This highlights the clear inconsistencies in the current models for seasonal rainfall  
423 predictions over East Asia.

424

425 10) Supp. Fig. 1. Columns show different months, but I do not understand what the three rows  
426 are showing. Is it the spatial pattern for 10 years? What if a different time block was chosen?

427 **Response:** The three rows in Supplementary Fig. 1 represent the spatial patterns in individual  
428 months for the three distinct seasonal spatiotemporal patterns identified in Fig. 2. As mentioned  
429 in the response to Comment #1, the spatiotemporal patterns in the space-day domain (Fig. 2)  
430 allows us to examine the spatial pattern at any given instant. These spatial patterns  
431 (Supplementary Fig. 1) were obtained by regressing the total rainfall anomalies at spatial  
432 resolutions against the yearly time series of each spatiotemporal pattern during the training  
433 period from 1980 to 2009, reflecting the spatial characteristics of the main evolution of seasonal  
434 rainfall anomalies. We have added a clearer description to the caption of Supplementary Fig. 1.

435

436 11) Fig. 4 shows interesting results. The dynamical model supersedes the skill of both PSMs  
437 for May. For all months presented in the figure, the authors have likely used the May start dates  
438 and it is not surprising that the skill drops with lead time for MME, which is common in  
439 dynamical prediction systems. I suspect that if the authors had used a start date closer to the  
440 forecast period, the skill would have increased substantially and would be comparable to the  
441 PSMs. Can the authors check this?

442 **Response:** Thanks for this good suggestion. In this study, our predictions start in May, which  
443 is the same as the MME mean forecasts for comparison. According to your suggestion, we have



444 compared our predictions (which still start from May) with MME forecasts started in June. As  
 445 shown in the figure below (Fig. R3), the PSM forecasts still outperform MME forecasts, despite  
 446 that the lead time of MME forecasts is one month shorter.  
 447

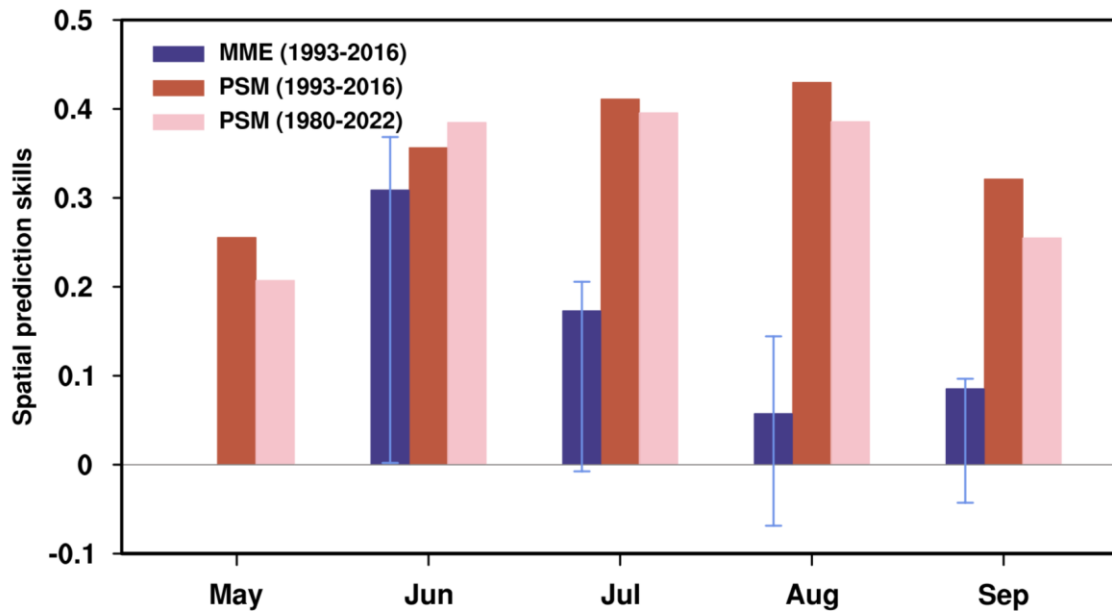

448  
 449 **Fig. R3** Multi-year mean forecast skills of the spatial pattern correlation against the total rainfall  
 450 anomalies in individual months in the multi-model ensemble (MME) mean of the dynamical  
 451 models initiated from June and the physical-statistical prediction model (PSM) initiated from  
 452 May. The blue line segments represent the ranges of forecast skills derived from individual  
 453 dynamical models.

454  
 455 12) Again, for this figure, I would be keen to see the skill of not MME but individual models,  
 456 and if any models have surpassed the skill of PSMs.

457 **Response:** Thanks for this suggestion. We have added new Supplementary Fig. 7 to clearly  
 458 show the prediction skills of individual dynamical models in capturing the spatial patterns of  
 459 rainfall anomalies in individual months. The results indicate that the forecasts from all  
 460 individual dynamical models (blue bars) perform worse than the MME mean forecasts (grey  
 461 dots) in capturing spatial patterns of rainfall anomalies as the lead time increases. Additionally,  
 462 we have included the range information of prediction skills among individual models in the  
 463 original Fig. 4b (now Fig. 5a) and added the following explanation in the revised manuscript:  
 464 “Meanwhile, the forecasts from all individual dynamical models perform worse than the MME  
 465 mean forecasts in capturing spatial patterns of rainfall anomalies as the lead time increases  
 466 (Supplementary Fig. 7).” (Please see **lines 219-221**)

467  
 468 13) I do not understand what is spatio-temporal correlation coefficient in Fig 4. Is it the same  
 469 as pattern/map correlation?

470 **Response:** As you mentioned, the spatio-temporal correlation coefficient is similar to map  
 471 correlation but applied to the latitude-time domain (see new Fig. 4). For example, in new Fig.  
 472 4d, the prediction skills, measured by spatiotemporal correlation coefficients, are calculated by

473 the map correlation between observed and forecasted spatiotemporal evolution in the latitude-  
474 time domain for each year (Figs. 4a and 4b), as depicted in Method section.

475 In this study, the spatiotemporal correlation coefficient is a crucial metric for assessing the  
476 model performance in predicting spatiotemporal evolution of rainfall anomalies, as it combines  
477 both spatial and temporal accuracy. It reflects how well the predicted spatiotemporal evolution  
478 match the corresponding observation across both space and time. A higher value indicates the  
479 model forecast is better at capturing the observed spatiotemporal evolution. We have added  
480 related description in the revision (please see **lines 207-210**).

481

482 [14\) Line 73: It should perhaps be “Only a few studies...”](#)

483 **Response:** Thanks for your suggestion. It has been revised to “Only a few studies” in the  
484 updated manuscript.

## **Review of “Skillful Seasonal Predictions of East Asian Summer Rainfall by Integrating its Spatio-Temporal Evolution**

This paper shows results on the prediction of the spatio-temporal evolution of rainfall within the summer monsoon season over East Asia. The authors propose a new statistical dynamical model to predict the spatial-temporal evolution of rainfall during the summer monsoon season over East Asia and argue that their proposed model supersedes the current dynamical prediction systems that are used operationally.

While I agree with the authors that we need models that can predict not only the magnitude of seasonal mean rainfall but also more detailed characteristics like the progression or retreat of monsoon, I have several major concerns requiring further clarification, particularly the distinction between the spatial distribution of monsoon rainfall and spatiotemporal evolution of monsoon rain. In summary, this paper requires significant revisions to clarify its objectives, strengthen the analysis, and address questions raised before it can be considered for publication.

Major comments:

There is confusion about the terminology and the question that the authors are trying to address in this paper. The paper is targeted toward the prediction of the spatio-temporal evolution of monsoon anomalies (lines 77-81) however most of the analysis and arguments are around models' ability to capture the spatial distribution of monsoon mean rainfall anomalies. To me, these are two different things. The first one refers to the spatial distribution of monsoon rain, e.g. analysis done in Fig. 1 and 2, and most of the statistical analysis focuses on the spatial pattern of monsoon mean rainfall (JJA) or interannual variability. The spatio-temporal evolution implies to me, the progression and retreat of monsoon during/within the monsoon season and involves intra-seasonal analysis. These two are of course interconnected but distinct issues and in many places, spatial distribution and spatiotemporal evolution are used interchangeably. I find it difficult to decipher which issue the authors are trying to address.

Most analyses presented here focus on spatial patterns using correlation coefficients and, in my opinion, these results can be very volatile due to multiple factors (decadal variability, model hindcast period, independent models, and large observational uncertainty). For example, the observations themselves are known to disagree on the spatial pattern, in that case, what is the truth and what do we expect from the models?

The authors use gauge data from CMA using land stations and then interpolate the data on a 1x1 grid to correlate the pattern with the models. The spatial pattern using this data could be substantially different from the spatial pattern using satellite data, for instance. I think much more evidence is needed to prove that the proposed statistical-dynamical model is good at capturing the spatial distribution and evolution of monsoon rainfall. I was also hoping to see some dynamic diagnostic that could potentially be used to predict the progression or retreat of East Asian monsoon.

The abstract mentions that the model uses non-conventional predictands, however, the precursors for inter-annual variation of rainfall are already identified by previous studies as mentioned in Supp. Table 2. Hence, I find this statement contradictory to the analysis.

I think the authors must consider the role of observational uncertainty leading to poor correlation values in this analysis.

My assumption from Fig 1d is that the authors have calculated PCC for each year, and then averaged PCC from each year over the full period. Have the authors tried to calculate the PCC for the climatological rainfall anomaly from models and observations? What is the value of PCC in that case? Also, JJA mean doesn't give much information about spatiotemporal evolution, but rather shows information on monsoon rainfall distribution. It would have been better for the authors to look at PCC for each month separately to focus on "evolution".

Fig. 1d shows that the models are not consistently bad in predicting the spatial distribution and there is large year-to-year variability in the ability of models to capture the spatial pattern. Is there a physical explanation for why the models are good for certain years and bad for others? For example, in 2016, 2011, 2014, and 1997 the dynamical models perform reasonably well.

Again, this is JJA, so figure Fig. 1d essentially captures the spatial distribution of rainfall during JJA and not the spatiotemporal evolution.

Could we have error bars in Fig. 1d, which shows the PCC from individual models and ensembles?

Supp. Fig. 1. Columns show different months, but I do not understand what the three rows are showing. Is it the spatial pattern for 10 years? What if a different time block was chosen?

Fig. 4 shows interesting results. The dynamical model supersedes the skill of both PSMs for May. For all months presented in the figure, the authors have likely used the May start dates and it is not surprising that the skill drops with lead time for MME, which is common in dynamical prediction systems. I suspect that if the authors had used a start date closer to the forecast period, the skill would have increased substantially and would be comparable to the PSMs. Can the authors check this?

Again, for this figure, I would be keen to see the skill of not MME but individual models, and if any models have surpassed the skill of PSMs.

I do not understand what is spatio-temporal correlation coefficient in Fig 4. Is it the same as pattern/map correlation?

Line 73: It should perhaps be "Only a few studies..."
